# Supplementary material
Source: publisher site journal article supplement (https://www.dovepress.com/article/558395)
Supplement: Supplementary file 1 [file 558395_Supplementary.docx]

Supplementary Figure S1. POD onset and duration.


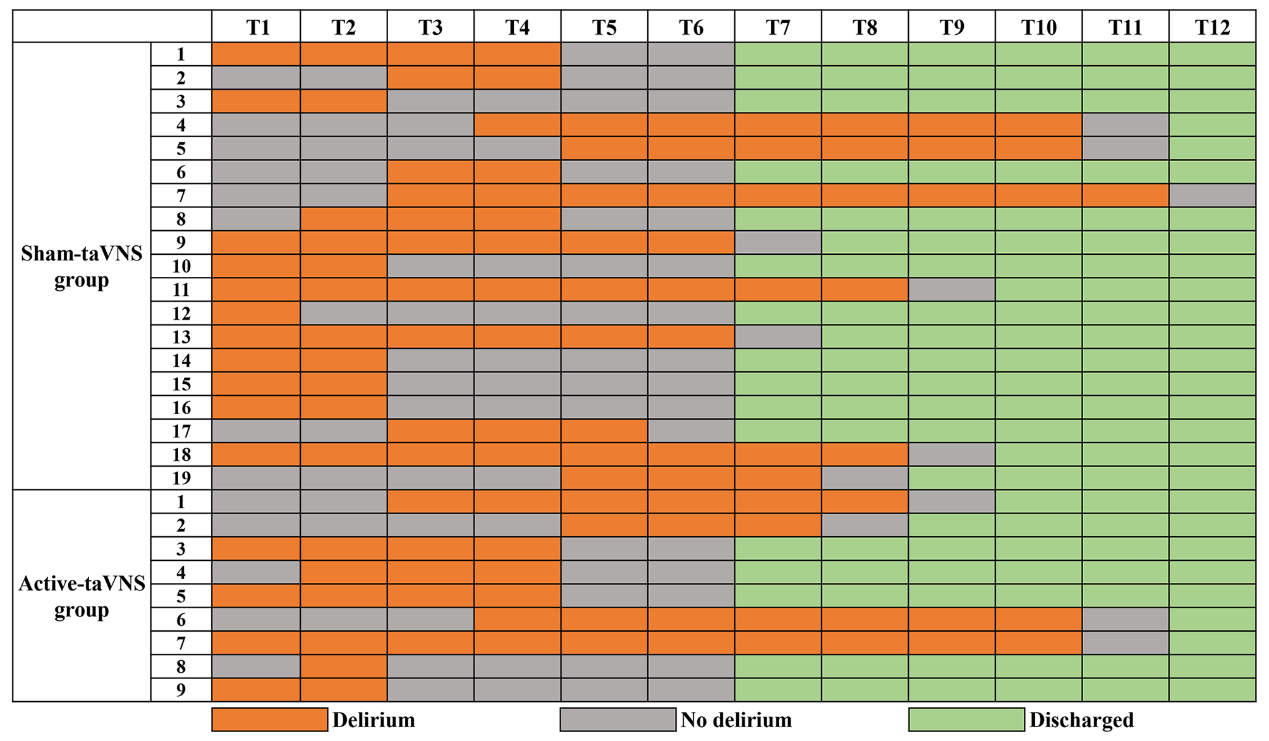


Supplementary Table S1. Univariable logistic analysis of the factors associated with POD

| **Variables** | **Unadjusted OR** | **95% CI** | ***P* value** |
| --- | --- | --- | --- |
| Age | 1.118 | 1.023–1.221 | **0.014** |
| Sex | 1.234 | 0.515–2.957 | 0.638 |
| ASA | 2.254 | 0.945–5.375 | 0.067 |
| Education | 0.951 | 0.865–1.046 | **0.034** |
| BMI | 1.112 | 0.977–1.266 | 0.108 |
| ICU admission | 5.927 | 2.329–15.086 | **<0.001** |
| Duration of surgery | 1.005 | 1.001–1.010 | **0.027** |
| Blood loss | 1.001 | 0.999–1.004 | 0.190 |
| Preoperative CRP | 1.014 | 0.963–1.068 | 0.607 |
| Preoperative NLR | 1.090 | 0.868–1.369 | 0.459 |
| Preoperative MMSE score | 0.851 | 0.753–0.962 | **0.010** |
| taVNS | 0.402 | 0.168–0.959 | **0.040** |

**Notes**: Specific subgroups include age (≤ 75 *vs.* > 75), sex (male *vs.* female), education (≤ 9 *vs.* > 9), BMI (≤ 24 *vs.* > 24), ICU admission (yes *vs.* no), duration of surgery (≤ 180 *vs.* > 180), blood loss (≤ 200 *vs.* > 200), preoperative MMSE score (≤ 28 *vs.* > 28). Bold font represented *P* value < 0.05.

**Abbreviations**: OR, odds ratio; CI, confidence interval; ASA, American Society of Anesthesiologists; ICU, intensive care unit; CRP, C-reactive protein; NLR, neutrophil-lymphocyte ratio; MMSE, Mini-Mental State Examination; taVNS, transcutaneous auricular vagus nerve stimulation.

Supplementary Table S2. Multivariate logistic analysis of the factors associated with POD

| **Variables** | **Adjusted OR** | **95% CI** | ***P* value** |
| --- | --- | --- | --- |
| Age | 1.130 | 1.007–1.269 | **0.038** |
| ASA | 3.410 | 1.106–10.514 | **0.033** |
| Education | 0.982 | 0.912–1.132 | **0.049** |
| ICU admission | 6.204 | 2.050–18.777 | **0.001** |
| Preoperative MMSE score | 0.881 | 0.765–1.015 | 0.080 |
| Duration of surgery | 1.005 | 0.999–1.011 | 0.128 |
| taVNS | 0.178 | 0.056–0.559 | **0.003** |

**Notes**: Specific subgroups include age (≤ 75 *vs.* > 75), education (≤ 9 *vs.* > 9), ICU admission (yes *vs.* no), preoperative MMSE score (≤ 28 *vs.* > 28), duration of surgery (≤ 180 *vs.* > 180). Bold font represented *P* value < 0.05.

**Abbreviations**: OR, odds ratio; CI, confidence interval; ASA, American Society of Anesthesiologists; ICU, intensive care unit; MMSE, Mini-Mental State Examination, taVNS, transcutaneous auricular vagus nerve stimulation.

Supplementary Table S3. Mediating effect of postoperative sleep quality on POD examined by bootstrap analysis

| **Mediator** | **Mediating Effect** | **95% CI** |
| --- | --- | --- |
| Postoperativesleep quality | −5.36% | −11.51% – −1.02% |

**Abbreviations**: CI, confidence interval.
